# Supplementary material for: Hollow silica nanoparticles loaded with industrial dyes for high exhaustion leather dyeing and its sustainability impact
Source: Royal Society of Chemistry journal article supplement (doi:10.1039/d3su00079f), 2023-01-01
Supplement: d3su00079f1.pdf [file d3su00079f1.pdf]

## Supporting Information

### **Hollow Silica Nanoparticles Loaded with Industrial Dyes for High Exhaustion Leather**

#### **Dyeing and its sustainability impact**

**Sathya Ramalingam<sup>a\*</sup>, Jonnalagadda Raghava Rao<sup>b</sup> and Kalarical Janardhanan Sreeram<sup>c</sup>**

<sup>a</sup> Leather Process Technology Department, Central Leather Research Institute, Adyar, Chennai 600 020, India.

<sup>b</sup> Inorganic and Physical Chemistry Laboratory, Central Leather Research Institute, Adyar, Chennai 600 020, India.

<sup>c</sup> Director- Central Leather Research Institute, Adyar, Chennai-600020, India.

\*Corresponding Author: rsathya@clri.res.in; Tel. +91 44 2443 7230

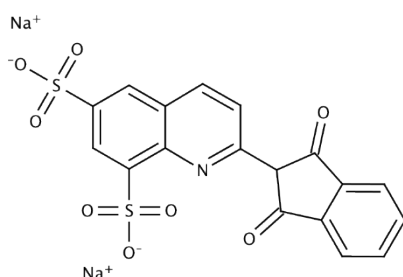

**Figure S1- Structure of the dye**

**Table S1 Sample code and its corresponding description**

| S.no | Sample name         | Description                                                                   | Dye characteristics |
|------|---------------------|-------------------------------------------------------------------------------|---------------------|
| 1    | <b>QY</b>           | Quinoline Yellow                                                              | Anionic Dye         |
| 2    | <b>QY-Si-OH</b>     | Quinoline Yellow modified with silica nanoparticles contains OH terminal.     |                     |
| 3    | <b>QY-Si-Methyl</b> | Quinoline Yellow modified with silica nanoparticles contains methyl terminal. |                     |

**Table S2** Post-tanning recipe adopted for upper leather processing

| <b>Raw Materials: Chrome tanned leather (goat)</b>             |                                                                                      |                       |                          |                                                   |
|----------------------------------------------------------------|--------------------------------------------------------------------------------------|-----------------------|--------------------------|---------------------------------------------------|
| <b>Process</b>                                                 | <b>Chemical Name</b>                                                                 | <b>% Offered</b>      | <b>Duration</b>          | <b>Remarks</b>                                    |
| Neutralization                                                 | Water<br>Neutralizing syntan +<br>Sodium bicarbonate +<br>water                      | 100<br>1 + 0.5 + 10   | (3 x 10 min)<br>+ 60 min | Cross-section pH: 5.2-<br>5.5<br>Drain/Wash/Drain |
| Dyeing                                                         | Dye                                                                                  | 1.5                   | -Run 45<br>min           | Check penetration                                 |
| Retanning                                                      | Acrylic syntan                                                                       | 3                     | - Run 20<br>min          | -                                                 |
|                                                                | Low molecular weight<br>phenolic syntan +<br>Melamine based<br>syntan +<br>GS powder | 5<br>+<br>4<br>+<br>4 | -Run 60 min              | -                                                 |
| Fatliquoring                                                   | Synthetic +<br>Sulphochlorinated fish<br>oil + Semi synthetic +<br>Water             | 6+4+2+50              | (3 x 15 min<br>) + 120   | -                                                 |
| Washing                                                        | Water                                                                                | 200                   | 15 min                   | Drain                                             |
| Fixing                                                         | Water<br>Formic acid                                                                 | 10<br>3               | (3 x 5 min)<br>+ 60 min  | Check exhaustion<br>/Drain                        |
| Next day:- Setting/ Vacuum Drying/ Hooking/ Stacking/ Buffing. |                                                                                      |                       |                          |                                                   |

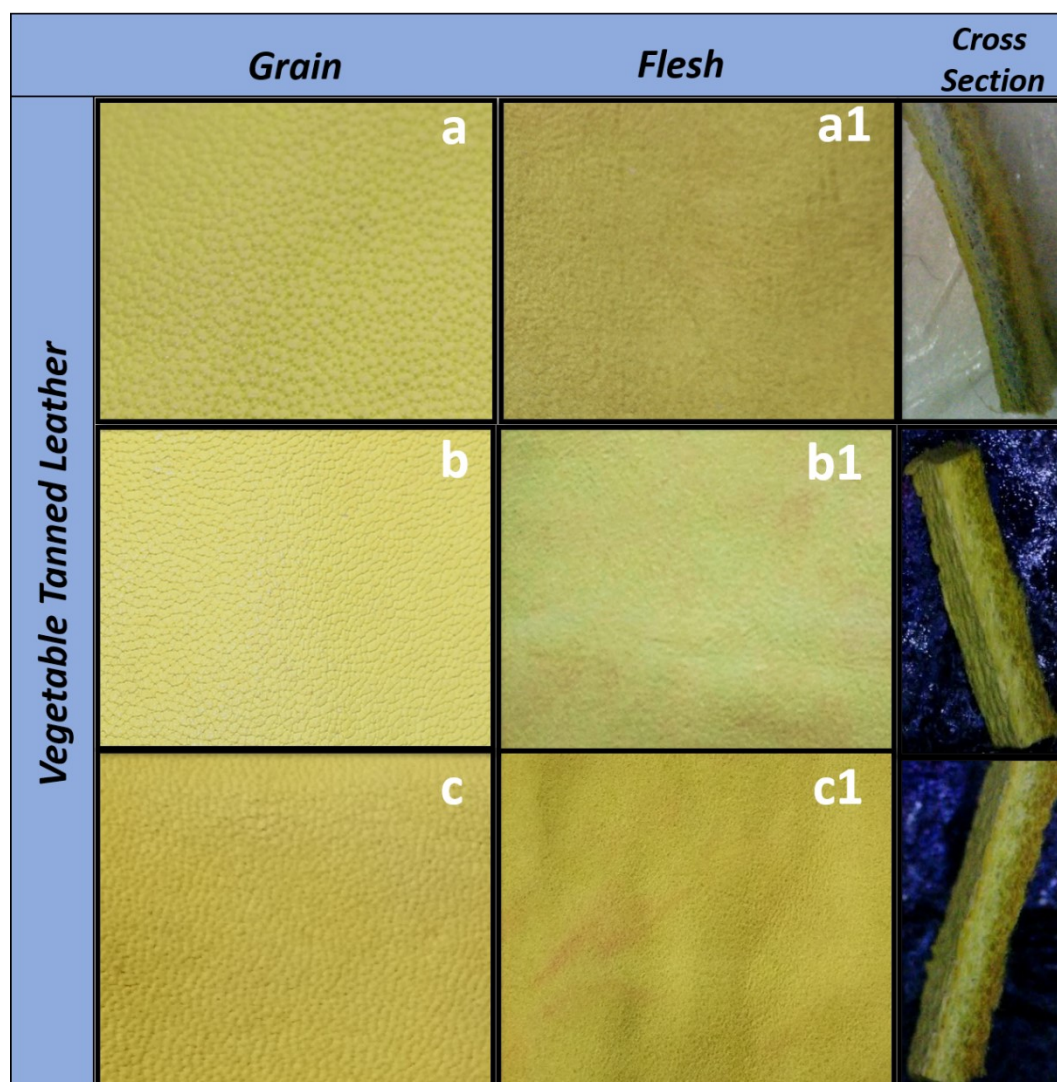

**Figure S2** The grain, flesh and cross-sectional view of chrome leather dyed with (a) Quinoline yellow dye, (b) Quinoline yellow modified silica with surface OH group (QY-Si-OH) and (c) Quinoline yellow modified silica with surface methyl group (QY-Si-Methyl). (a1), (b1), and (c1) represent their corresponding flesh side of dyed leather

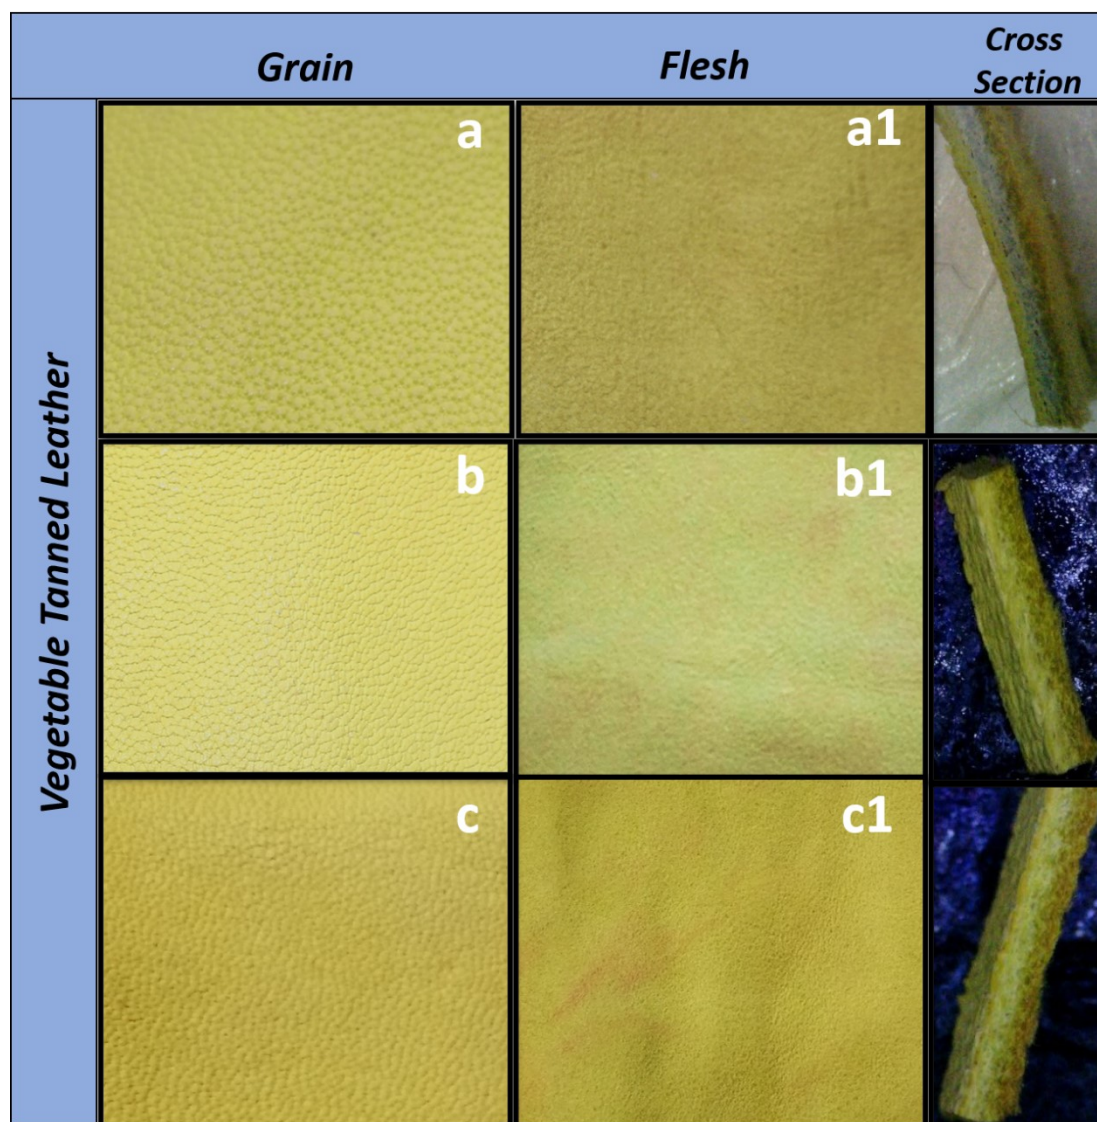

**Figure S3** The grain, flesh and cross-sectional view of vegetable leather dyed with (a) free Quinoline yellow dye, (b) Quinoline yellow modified into silica with surface OH group (QY-Si-OH) and (c) Quinoline yellow modified into silica with surface methyl group (QY-Si-Methyl). (a1), (b1), and (c1) represent their corresponding flesh side of dyed leather.

**Table S3** Greyscale rating of leather dyed with free and dye modified silica nanoparticles during fastness to the water

| Sample Name                     |              | Cellulose acetate | Bleached cotton | Spun nylon | Spun polyester | Spun acrylic | Worsted spun wool |
|---------------------------------|--------------|-------------------|-----------------|------------|----------------|--------------|-------------------|
| <i>Chrome Tanned Leather</i>    | QY           | 4                 | 4               | 4          | 4              | 4            | 4                 |
|                                 | QY-Si-OH     | 4                 | 4/5             | 4          | 4/5            | 5            | 5                 |
|                                 | QY-Si-Methyl | 4/5               | 4/5             | 5          | 4/5            | 4/5          | 4/5               |
| <i>Vegetable Tanned Leather</i> | QY           | 4                 | 4               | 3/4        | 4              | 4            | 3/4               |
|                                 | QY-Si-OH     | 4/5               | 4/5             | 5          | 4/5            | 5            | 5                 |
|                                 | QY-Si-Methyl | 4/5               | 4/5             | 4          | 4/5            | 4/5          | 4/5               |

**Table S4** Coloured matrix exposed to different temperatures with its greyscale rating and their respective colour swatches.

|                                 | Sample name  | Grey Scale Rating |       |       |       |       | Colour Swatch                                                                         |                                                                                       |
|---------------------------------|--------------|-------------------|-------|-------|-------|-------|---------------------------------------------------------------------------------------|---------------------------------------------------------------------------------------|
|                                 |              | 50°C              | 100°C | 150°C | 200°C | 250°C | 0°C                                                                                   | 250°C                                                                                 |
| <i>Chrome Tanned Leather</i>    | QY           | 5                 | 5     | 4/5   | 4     | 4     | 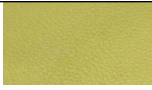 | 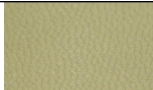 |
|                                 | QY-Si-OH     | 5                 | 5     | 5     | 4/5   | 4/5   | 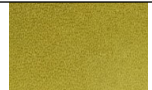 | 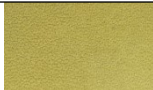 |
|                                 | QY-Si-Methyl | 5                 | 5     | 5     | 5     | 4/5   | 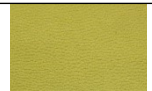 | 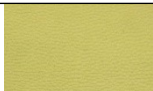 |
| <i>Vegetable Tanned Leather</i> | QY           | 4                 | 3/4   | 3     | 3     | 2     | 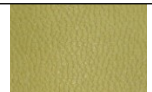 | 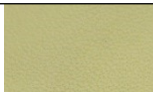 |
|                                 | QY-Si-OH     | 5                 | 5     | 5     | 4     | 4     | 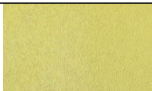 | 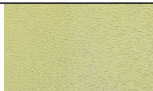 |
|                                 | QY-Si-Methyl | 5                 | 5     | 4/5   | 4/5   | 4/5   | 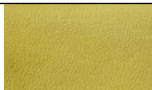 | 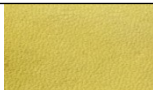 |

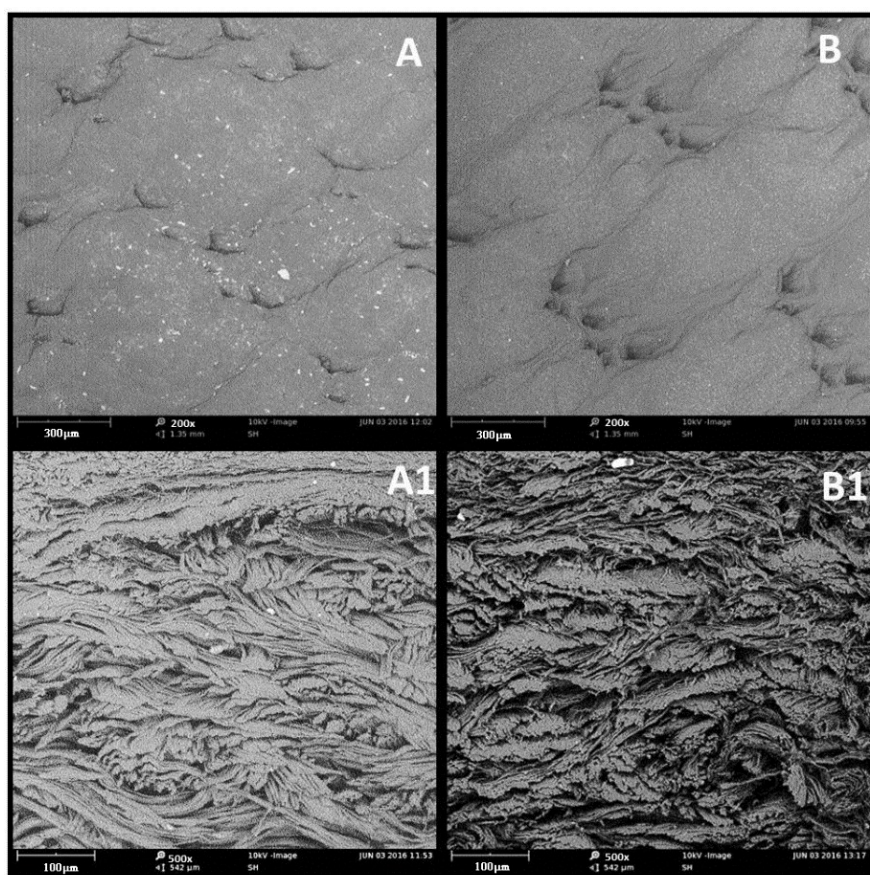

**Figure S4** The Scanning Electron Microscopic Image A) and B) showing the details of grain surface of dye modified with silica nanoparticles treated Chrome tanned leather and Vegetable tanned leather respectively and A1- B1 are their corresponding cross-sectional image.

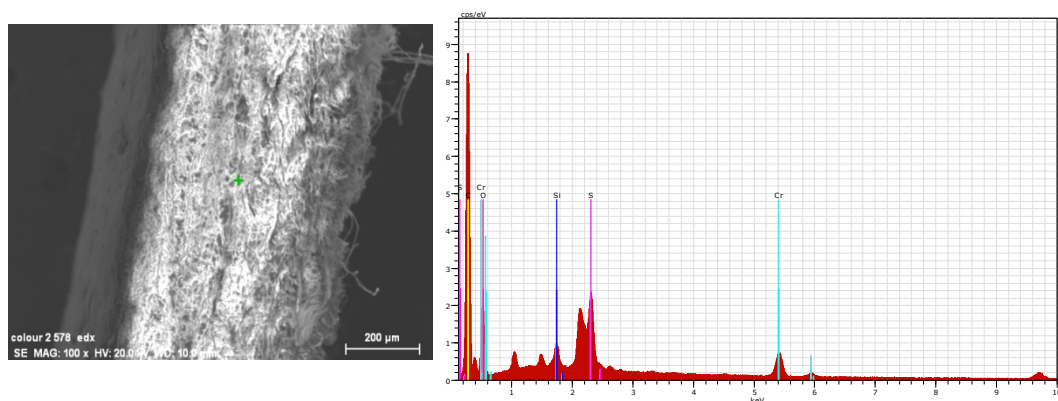

**Figure S5** The Scanning Electron Microscopic image and elemental analysis of chrome tanned leather dyed with a free dye

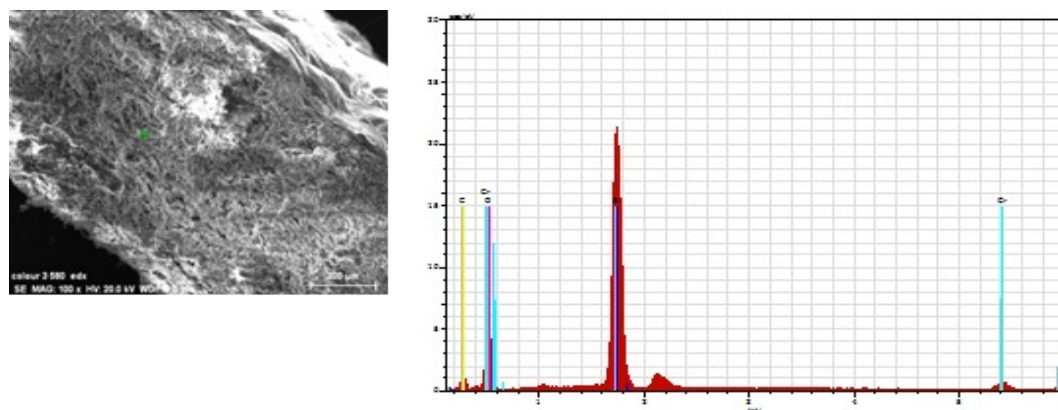

**Figure S6** The Scanning Electron Microscopic image and elemental analysis of chrome tanned leather dyed with dye modified silica nanoparticles

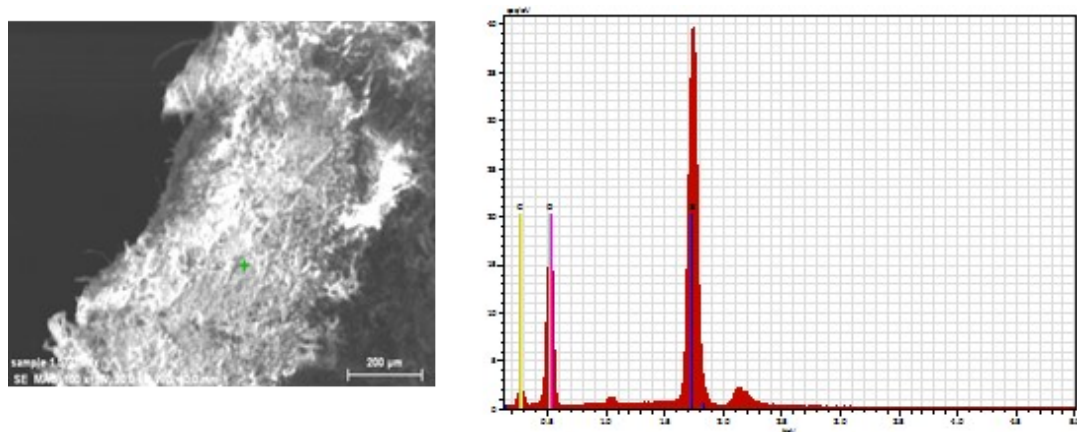

| El | AN | Series   | unn. C<br>[wt.%] | norm. C<br>[wt.%] | Atom. C<br>[wt.%] | Error<br>[wt.%] |
|----|----|----------|------------------|-------------------|-------------------|-----------------|
| O  | 8  | K-series | 23.04            | 57.28             | 70.19             | 2.6             |
| Si | 14 | K-series | 17.18            | 42.72             | 29.81             | 0.8             |
|    |    | Total:   | 40.22            | 100.00            | 100.00            |                 |

**Figure S7** The Scanning Electron Microscopic image and elemental analysis of vegetable tanned leather dyed with dye modified silica nanoparticles.

#### Equation 1

$$E \text{ Factor} = (\text{Mass of the waste}) \div (\text{Mass of the Product})$$

#### Equation 2

$$\text{Mass Intensity} = ((\text{Total mass of material used})(Kg)) \div ((\text{mass of the product})(Kg))$$
